# Supplementary material for: Congenital Zika Syndrome: A Nationwide Cohort Study in Brazil, 2015-2018
Source: PubMed Central journal article supplement (PMC7612437; doi:10.1056/nejmoa2101195), 2022-02-24
Supplement: EMS140779-supplement-Supplement.pdf [file EMS140779-supplement-Supplement.pdf]

## Appendix

### Congenital Zika Syndrome: A Nationwide Cohort Study in Brazil, 2015-2018

Enny S. Paixao, Ph.D<sup>1,2\*</sup>, Luciana L. Cardim, Ph.D<sup>2\*</sup>, Maria da Conceição N. Costa, MD, Ph.D<sup>2,3</sup>, Elizabeth B. Brickley, Ph.D<sup>1</sup>, Rita de Cassia Oliveira de Carvalho-Sauer, MSc<sup>4</sup>, Eduardo H Carmo, MD, Ph.D<sup>2</sup>, Roberto F. S. Andrade, Ph.D<sup>2</sup>, Moreno S. Rodrigues, Ph.D<sup>2</sup>, Rafael V. Veiga, Ph.D<sup>2</sup>, Larissa C. Costa, Ph.D<sup>2</sup> Cynthia A. Moore, MD, Ph.D<sup>5</sup>, Giovanny V. A. França, Ph.D<sup>6</sup>, Liam Smeeth, MD, Ph.D<sup>1</sup> Laura C. Rodrigues MD, Ph.D<sup>1,2</sup>, Mauricio L. Barreto, MD, Ph.D<sup>2,3#</sup>, Maria Gloria Teixeira MD, Ph.D<sup>2,3#</sup>

#### Table of contents

|                                                                                                                                                  |   |
|--------------------------------------------------------------------------------------------------------------------------------------------------|---|
| Figure S1: Flowchart study population Brazil, 2015-2018 -----                                                                                    | 2 |
| Figure S2 Flowchart for classification criteria for congenital Zika syndrome -----                                                               | 3 |
| Table S1: Mortality risk by age group among singleton live births in the cohort-linked data (CZS confirmed cases only), Brazil, 2015-2018. ----- | 4 |
| Table S2: Main findings in infants with congenital Zika syndrome -----                                                                           | 5 |

**Figure S1. Flowchart study population Brazil, 2015-2018.**

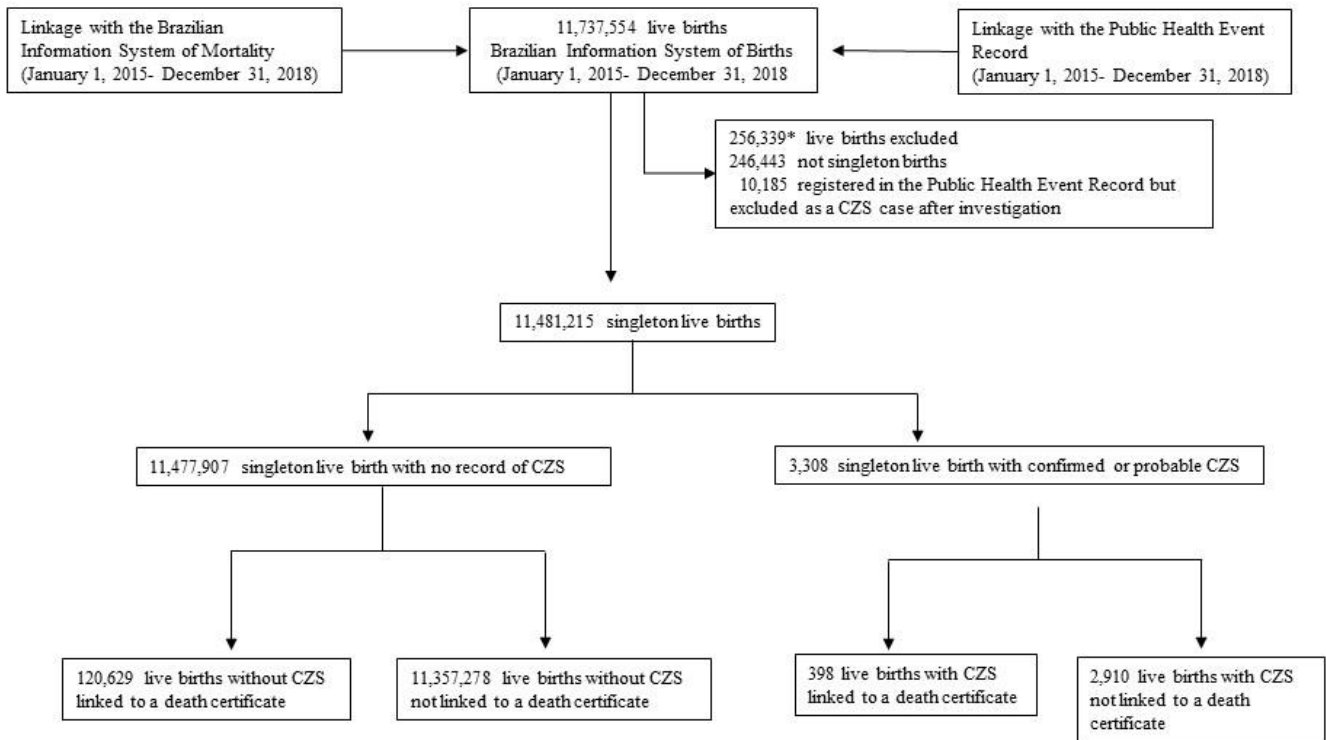

\* The exclusions do not sum to 256,339 because a record may be multiples and excluded as a CZS case after investigation  
 • Congenital Zika Syndrome

**Figure S2. Flowchart for classification criteria for congenital Zika syndrome**

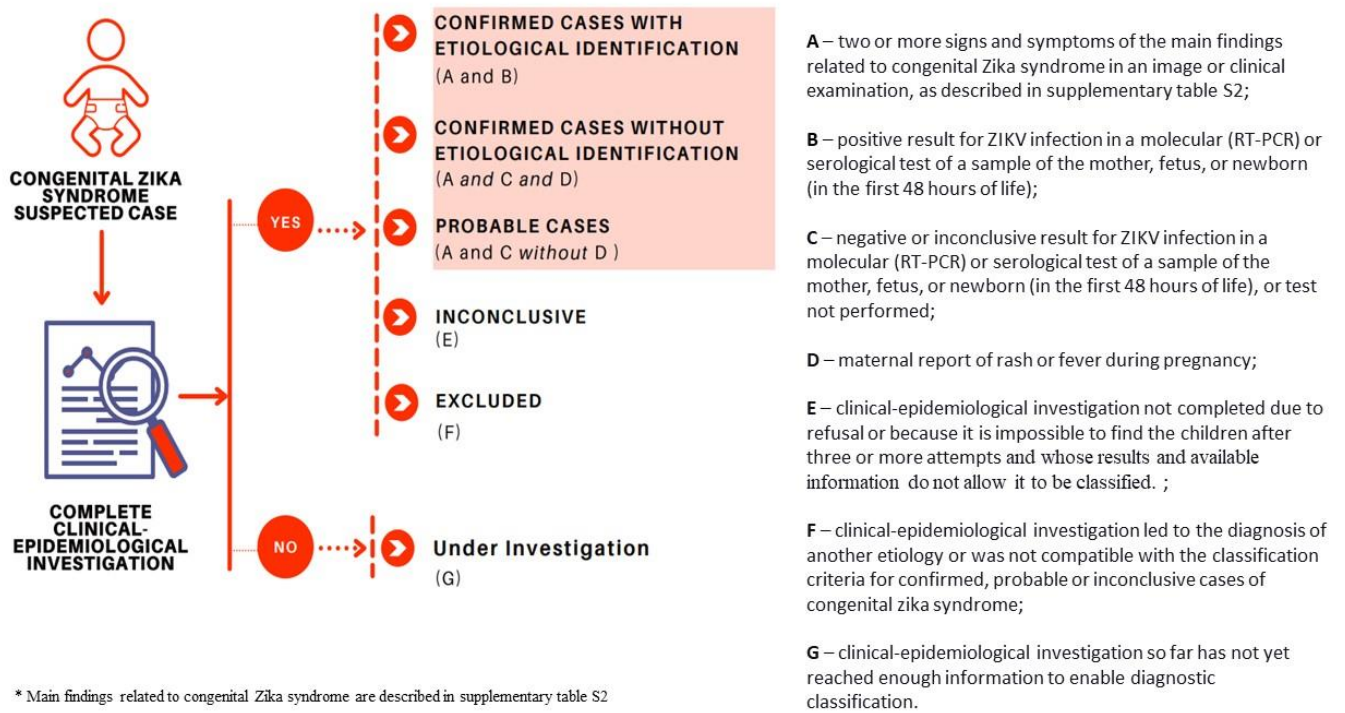

\*Based on the Brazilian Ministry of Health Guideline

**Table S1: Mortality risk by age group among singleton live births in the cohort-linked data (CZS confirmed cases only), Brazil, 2015-2018.**

| Live births                                    | Live births with CZS   | Live births without CZS | HR for mortality (95% CI) |
|------------------------------------------------|------------------------|-------------------------|---------------------------|
| <b>Neonatal mortality (up to 27 days)</b>      |                        |                         |                           |
| Neonatal deaths                                | 123                    | 80,006                  |                           |
| Deaths per 1,000 PY                            | 639.01 (535.50-762.54) | 95.7 (95.0 - 96.3)      | 6.6 (5.5-7.9)             |
| <b>Post-neonatal mortality (28-364 days)</b>   |                        |                         |                           |
| Post-neonatal deaths                           | 119                    | 32,175                  |                           |
| Deaths per 1,000 PY                            | 51.98 (43.43-62.21)    | 3.5 (3.5 - 3.6)         | 15.3 (12.8-18.3)          |
| <b>Infant mortality (up to 364 days)</b>       |                        |                         |                           |
| Infant deaths                                  | 242                    | 112,181                 |                           |
| Deaths per 1,000 PY                            | 97.3 (85.7-110.3)      | 11.3 (11.2 - 11.3)      | 9.2 (8.1-10.4)            |
| <b>Mortality after one year (12-36 months)</b> |                        |                         |                           |
| Deaths after 1 year                            | 57                     | 8,448                   |                           |
| Deaths per 1,000 PY                            | 14.01 (10.9-18.3)      | 0.7 (0.7-0.8)           | 19.8 (15.2-25.7)          |
| <b>Total mortality (up to 36 months)</b>       |                        |                         |                           |
| Total Deaths                                   | 299                    | 120,629                 |                           |
| Deaths per 1,000 PY                            | 45.8 (40.9-51.3)       | 5.6 (5.6-5.7)           | 10.2 (9.1-11.5)           |

PY= person years

\*Confirmed cases only

**Table S2: Main findings in infants with congenital Zika syndrome (translation from material published by the Brazilian Ministry of Health)<sup>1</sup>**

| <b>Most common findings identified prenatally</b>                                 |                                                                                            |                                                                    |                            |
|-----------------------------------------------------------------------------------|--------------------------------------------------------------------------------------------|--------------------------------------------------------------------|----------------------------|
| <i>Structural CNS/cranial</i>                                                     | <i>Facial dysmorphia</i>                                                                   | <i>Neurologic sequelae</i>                                         | <i>Other</i>               |
| Microcephaly/microencephaly                                                       | Flat face                                                                                  | Static position of hands and feet<br>(indicative of arthrogyposis) | Polyhydramnios             |
| Craniofacial disproportion                                                        | Retrognathia                                                                               |                                                                    |                            |
| Prominent occipital bone                                                          | Hypotelorism                                                                               |                                                                    |                            |
| Misshapen cerebellar vermis                                                       | Redundant scalp                                                                            |                                                                    |                            |
| Ventriculomegaly (mild, moderate, severe), ex vacuo/hydrocephalus                 |                                                                                            |                                                                    |                            |
| Brain calcifications, diffuse                                                     |                                                                                            |                                                                    |                            |
| Ventricular synechiae                                                             |                                                                                            |                                                                    |                            |
| Agenesis of the corpus callosum                                                   |                                                                                            |                                                                    |                            |
| Schizencephaly/porencephaly                                                       |                                                                                            |                                                                    |                            |
| Cerebral cortex thinning                                                          |                                                                                            |                                                                    |                            |
| Microphthalmia                                                                    |                                                                                            |                                                                    |                            |
| <b>Most common findings identified at birth or within the first month of life</b> |                                                                                            |                                                                    |                            |
| <i>Structural CNS/cranial</i>                                                     | <i>Neurosensory sequelae</i>                                                               | <i>Neurologic sequelae</i>                                         | <i>Other</i>               |
| Microcephaly                                                                      | Retinal mapping changes                                                                    | Changes in muscle tone                                             |                            |
| Craniofacial disproportion                                                        | Lesions of retinal epithelium/ unusual pigmentation                                        | Changes in posture                                                 |                            |
| Brain calcifications                                                              | Retinal atrophic circular lesions                                                          | Hyperexcitability/hyperirritability                                |                            |
| Abnormal cortical development/ polymicrogyria/simplified gyri                     | Optic nerve changes (hypoplasia, partial/complete atrophy, increased papillary excavation) | Epileptic seizures                                                 |                            |
| Cortical thickening, frontoparietal                                               | Alteration of visual function                                                              | Difficulties with suck and swallow                                 |                            |
| Ventriculomegaly                                                                  | Alteration of auditory function                                                            | Joint contractures                                                 |                            |
| Hypoplastic brain stem                                                            | Abnormal eye movements                                                                     |                                                                    |                            |
| Hypoplastic cerebrum/alterations posterior fossa                                  |                                                                                            |                                                                    |                            |
| Hypoplastic corpus callosum                                                       |                                                                                            |                                                                    |                            |
| Retinal and optic nerve anomalies                                                 |                                                                                            |                                                                    |                            |
| <b>Findings identified after the first month of life</b>                          |                                                                                            |                                                                    |                            |
| <i>Structural CNS/cranial</i>                                                     | <i>Neurosensory sequelae</i>                                                               | <i>Neurologic sequelae</i>                                         | <i>Other</i>               |
|                                                                                   |                                                                                            | <b>Most frequent</b>                                               |                            |
| Craniofacial disproportion                                                        | Visual changes (inattention)                                                               | Dysphagia                                                          | Congenital hip dislocation |
| Changes in HC due to hydrocephalus                                                | Strabismus, nystagmus                                                                      | Epilepsy/spasms                                                    |                            |

Brain calcifications  
Dysmorphic corpus callosum  
Ventriculomegaly

Changes in retinal mapping  
Alteration of auditory function

Irritability  
Hypertonia  
Persistent primitive reflexes

**Frequent**

Sensorineural hearing loss

**Rare**

Microphthalmia  
Coloboma

Cryptorchidism  
Hypospadias

Cataract  
Glaucoma

---

CNS – central nervous system  
HC – head circumference

**Reference**

1. Ministério da Saúde (BR). *Orientações integradas de vigilância e atenção à saúde no âmbito da Emergência de Saúde Pública de Importância Nacional*. Ministério da Saúde. (2017).
